# Supplementary material
Source: Springer Nature journal article supplement (https://www.springermedizin.de/resource/supplementary/40169_2014_54_MOESM2_ESM.pdf/9675476)

**Muse-AT cells****ASCs**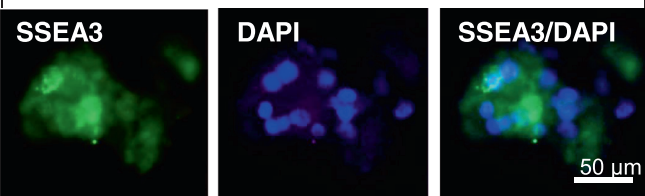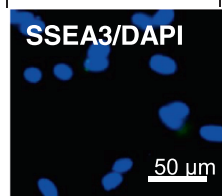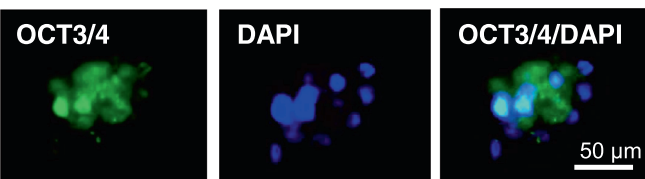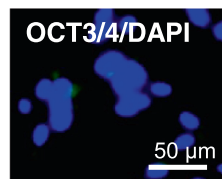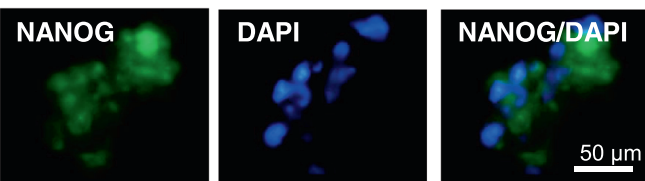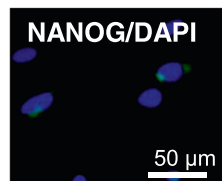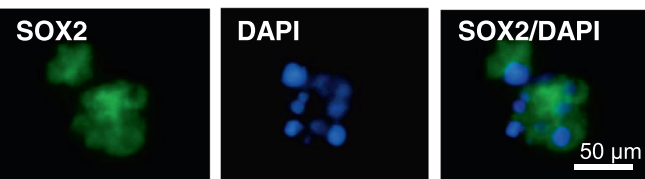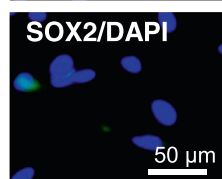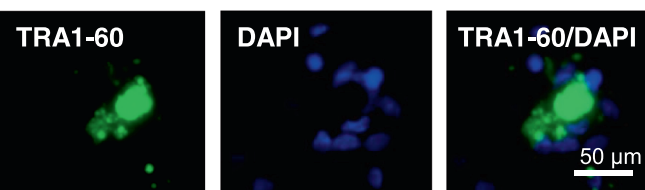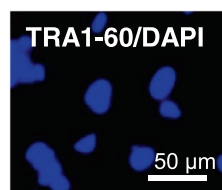

Supplement: MOESM2 [file 9675476]
